# Supplementary material
Source: PubMed Central journal article supplement (PMC2991209)
Supplement: Supp_Fig.pdf [file Supp_Fig.pdf]

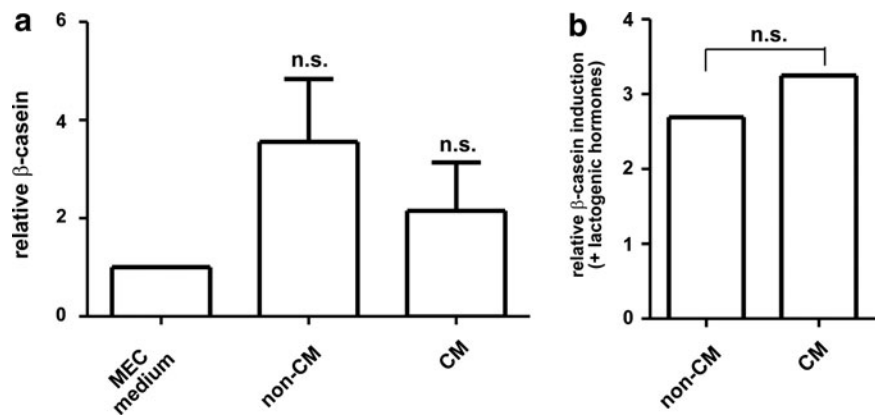

**SUPPLEMENTAL FIG. S1.** Adipocytes have no effect on lactogenic differentiation of mammary epithelial cells. **(a)** Tubules were treated with mammary epithelial cell (MEC) medium, adipocyte maintenance medium (non-conditioned medium [CM]), or adipocyte-CM for 24 h and assayed for functional differentiation via quantitative reverse transcription (RT)-polymerase chain reaction analysis of  $\beta$ -casein expression. **(b)** Tubules were treated with lactogenic hormones in the presence of non-CM or CM for 24 h and assayed for  $\beta$ -casein expression. Results are normalized to cultures in the absence of lactogenic hormones. n.s., no significant difference.
